# Supplementary material
Source: PubMed Central journal article supplement (PMC2650297)
Supplement: 0807899106_0807899106SI.pdf [file 0807899106_0807899106SI.pdf]

# Supporting Information

Sasaki et al. 10.1073/pnas.0807899106

## SI Text

**Cell Culture.** HeLa, HEK293, MCF7, and NIH 3T3 cells were grown in DMEM supplemented with 10% FBS (Cell Culture Technologies) at 37 °C and 5% CO<sub>2</sub> in a humidified incubator. MRC5 and T24 cells were grown in MEN $\alpha$  (GIBCO) and McCoy's 5A medium (GIBCO), respectively. Some cells were treated with actinomycin D (0.03 or 0.3  $\mu$ g/mL, 4 h) or with DRB (100  $\mu$ M, 6 h) (Sigma).

**Cell Fractionation.** We followed the nucleolar isolation protocol developed by the Lamond laboratory. ([www.lamondlab.com/f/nucleolarprotocol.htm](http://www.lamondlab.com/f/nucleolarprotocol.htm)). HeLa nuclei were prepared from  $1 \times 10^8$  cells, washed 3 times with PBS, resuspended in 5 mL of buffer A [10 mM Hepes (pH 7.9), 10 mM KCl, 1.5 mM MgCl<sub>2</sub>, 0.5 mM DTT], and homogenized for 10 strokes by using a Dounce homogenizer with a tight pestle. An aliquot of the cell homogenate was removed as a source for total RNA. The rest of the cell homogenate was centrifuged at  $218 \times g$  for 5 min at 4 °C, yielding the cytosolic (supernatant) and nuclear (pellet) fractions. The pellet was resuspended in 3 mL of S1 solution (0.25 M sucrose, 10 mM MgCl<sub>2</sub>), overlaid onto 3 mL of S2 solution (0.35 M sucrose, 0.5 mM MgCl<sub>2</sub>), and centrifuged at  $1,430 \times g$  for 5 min at 4 °C. The pellet was resuspended in 3 mL of S2 solution and an aliquot was removed as the nuclear fraction. The rest of the suspension was sonicated by 5-s pulses repeated 20 times by using a hand-held sonicator equipped with a microprobe (UR-20P; TOMY Seiko) at 80% of the maximum output. The sonicate was overlaid onto an equal volume of S3 solution (0.88 M sucrose, 0.5 mM MgCl<sub>2</sub>). Before centrifugation, the border of the 2 layers was marked on the tube. The solution was then centrifuged at  $5,000 \times g$  for 10 min at 4 °C, resulting in 2 layers of supernatant (Np1 and Np2) and 1 pellet (No). The pellet was rinsed with S2 solution and recovered by centrifugation. The resulting pellet and the previously obtained fractions were subjected to RNA extraction.

**RNA FISH.** FISH was performed basically as described (1). In brief, cells were seeded onto a multichamber culture slide (BD Falcon) and fixed with 4% paraformaldehyde in PBS. After deproteinization and dehydration, the slides were incubated with prehybridization solution (2 $\times$  SSC, 1 $\times$  Denhardt solution, 50% formamide, 10 mM EDTA, 100  $\mu$ g/mL yeast tRNA, and 0.01% Tween 20) at 55 °C for 2 h. RNA probes were prepared by using a DIG/FITC RNA labeling kit (Roche). Prehybridized slides were incubated with a hybridization solution (the prehybridization solution plus 5% dextran sulfate), containing the DIG- and/or FITC-labeled RNA probe, at 55 °C for 16 h. The slides were washed twice with prewarmed wash buffer (2 $\times$  SSC, 50% formamide, and 0.01% Tween-20) at 55 °C for 30 min. Excess RNA probes were then digested with 10  $\mu$ g/mL RNase A in NTET [10 mM Tris-HCl (pH 8.0), 1 mM EDTA, 500 mM NaCl, and 0.1% Tween-20] at 37 °C for 1 h. The slides were washed with buffer (2 $\times$  SSC, 0.01% Tween-20) at 55 °C for 30 min and twice with a second buffer (0.1 $\times$  SSC, 0.01% Tween-20) at 55 °C for 30 min. Probe detection was carried out as follows. The slides were blocked with 1% Roche Blocking Reagent in TBST (Tris-buffered saline, 0.01% Tween-20) at room temperature (RT) for 1 h and then incubated with anti-DIG and/or anti-FITC antibodies diluted with a blocking reagent for 1 h. Unbound antibodies were removed by washing 3 times in TBST for 15 min. The slides were incubated with a fluorophore-conjugated secondary antibody for 1 h. After washing, the slides were covered with Vectashield (Vector Laboratories) containing 4', 6-diamidino-2-phenylindole (DAPI).

**Immunofluorescence.** Cells were seeded onto culture slides and fixed with 4% paraformaldehyde/PBS. The cells were permeabilized with 0.2% Triton X-100/PBS for 5 min, rinsed, and then blocked with 10% normal horse serum (Vector Laboratories) in PBS for 1 h. Primary antibodies against proteins and/or against the hapten of the RNA probes were applied overnight at 4 °C and then washed 3 times with PBST (PBS, 0.01% Tween-20) for 15 min. Alexa-conjugated secondary antibodies (Molecular Probes, Invitrogen) were applied for 1 h at RT. After washing, the samples were counterstained with DAPI.

**Fluorescence Microscopy.** Immunostained cells were examined by using an LSM 510 META laser-scanning microscope with a C-Apochromat 40X/1.2W lens (Carl Zeiss). Each data series (samples on a single 8-chambered culture slide probed with the same probe and/or antibodies) was processed with fixed parameters so that the signal intensities could be compared. Acquired confocal images were pseudocolored and merged by using an image analysis software (LSM Image Browser).

**Quantitative Reverse Transcription-PCR (qRT-PCR).** qRT-PCR was carried out as described (2). Briefly, total RNA was prepared from cell cultures, fractionated cell lysates, and knockdown oligo-treated cells using a PARIS kit (Ambion). RNA (1  $\mu$ g) was reverse transcribed using a QuantiTect reverse transcription kit (Qiagen). Primers were designed using the Primer3 software (see Table S3) and purchased from Invitrogen. Aliquots of cDNA were subjected to real-time PCR, performed using a Lightcycler 480 SYBR green I Master (Roche Diagnostics) according to the manufacturer's protocol.

**Northern Blotting.** A 10- $\mu$ g aliquot of total RNA per lane was separated on a 0.8% agarose gel containing 2% formaldehyde and was blotted to a positively charged nylon membrane (Hybond N+; Amersham Biosciences). After UV cross-link, the blots were hybridized overnight to <sup>32</sup>P-labeled cDNA probes at 68 °C in an ExpressHyb Hybridization solution (Clontech). Autoradiography was processed using a Fuji BAS2500 Bio-imaging analyzer.

**RNase Protection Assay.** The RNase protection assay was performed as described previously (3). The probes used were internally <sup>32</sup>P-labeled antisense MEN $\epsilon$ / $\beta$  RNAs covering the sequences shown in Fig. S1. The protected RNA fragments were separated on 8% denaturing polyacrylamide gels.

**RNAi.** RNAi was carried out as described (4). The siRNAs for p54 were synthesized by Sigma Genosys, Inc., and those for PSP1 were purchased from Ambion (#116209 and #132412). For PSF, stealth siRNAs were synthesized by Invitrogen. HeLa cells were grown to 30–50% confluency in 6-well tissue culture dishes. The siRNA duplexes (50 nM) were administered to the HeLa cells using Lipofectamine 2000 according to the manufacturer's instructions (Invitrogen). After 48 h, total RNA was prepared using an RNAeasy kit (Qiagen). qRT-PCR was carried out as described previously (2).

**Ectopic Expression of MEN $\epsilon$ / $\beta$ .** MEN $\epsilon$  was reverse-transcribed with a dT primer and subcloned into the pMIR-REPORT Luciferase vector (Ambion) at the Mlu I/Pme I site. MEN $\beta$  lacking the 3' 10 kb was created by recombineering (5). A retrieving vector was constructed based on the pMIR-REPORT Luciferase, in which

2 500-bp fragments homologous to MEN $\beta$  were inserted into the Mlu I/Pme I site and the Pme I/HindIII site, respectively. For the oligonucleotide sequences used to amplify homologous fragments, see Table S1. The retrieving vector was electroporated into *E. coli* harboring the BAC clone CITB2521O8 (Invitrogen), which contains the entire MEN $\epsilon/\beta$  sequence. These 2 MEN $\epsilon/\beta$  constructs were transfected to HeLa or NIH 3T3 cells using Lipofectamine 2000 (Invitrogen). Localization of ectopically expressed RNA was examined by double-labeling FISH for endogenous MEN $\epsilon/\beta$  and costained with antibodies for endogenous paraspeckle proteins.

**Statistical Analyses.** An unpaired, 2-tailed *t* test was carried out for the data shown in Fig. 5A and C. We separated our observations into 2 categories by selecting 2 nonoverlapping probes among the 7 probes. Observations from these 2 probes were associated with one category, and the rest of the observations were associated with the other category. There were 21 (i.e.,  $7 \times (7 - 1)/2$ ) possible combinations of the 2 probes for all 7 probes. We then

performed unpaired, 2-tailed *t* tests for the categorized observations. For the actual computation, we used the *t* test function included in the R software package. The alternative hypothesis used was that the means of the 2 samples are greater/less than the other. Table S3 shows the probe combinations that displayed the lowest *P* value. For p54 and PSF, the probe combo 1–2 showed the lowest *P* value and was found to be significant ( $P < 0.01$ ). PSP1 did not display any significance by this *t* test.  $\alpha$ Flag and Flag-pcDNA probes did not show significant differences, whereas the  $\alpha$ PSF and Flag-p54 1–2 probe combo significantly differed from the 4–8 combo. For Fig. 5D, we carried out paired *t* tests to evaluate the statistical significance for differences of the average relative MEN $\epsilon/\beta$  levels between each pair of experiments (p54+UV 1, 2, 4, and 8). Table S5 shows the *P* values obtained by the *t* tests. No statistically significant differences were found for the experiments 1–2 and 4–8, whereas the other combinations yielded significant differences. The computation was performed using the *t.test* function (alternatives = “less” and paired = TRUE, whereas other options remain default values) of the open source software R ([www.r-project.org/](http://www.r-project.org/)).

1. Sone M, et al. (2007) The mRNA-like noncoding RNA Gomafu constitutes a novel nuclear domain in a subset of neurons. *J Cell Sci* 120:2498–2506.
2. Sasaki YTF, et al. (2007) Identification and characterization of human non-coding RNAs with tissue-specific expression. *Biochem Biophys Res Commun* 357:991–996.
3. Hirose T, Steitz JA (2001) Position within the host intron is critical for efficient processing of box C/D snoRNAs in mammalian cells. *Proc Natl Acad Sci USA* 98:12914–12919.
4. Ideue T, Sasaki YTF, Hagiwara M, Hirose T (2007) Introns play an essential role in splicing-dependent formation of the exon junction complex. *Genes Dev* 21:1993–1998.
5. Liu P, Jenkins NA, Copeland NG (2003) A highly efficient recombineering-based method for generating conditional knockout mutations. *Genome Res* 13:476–484.

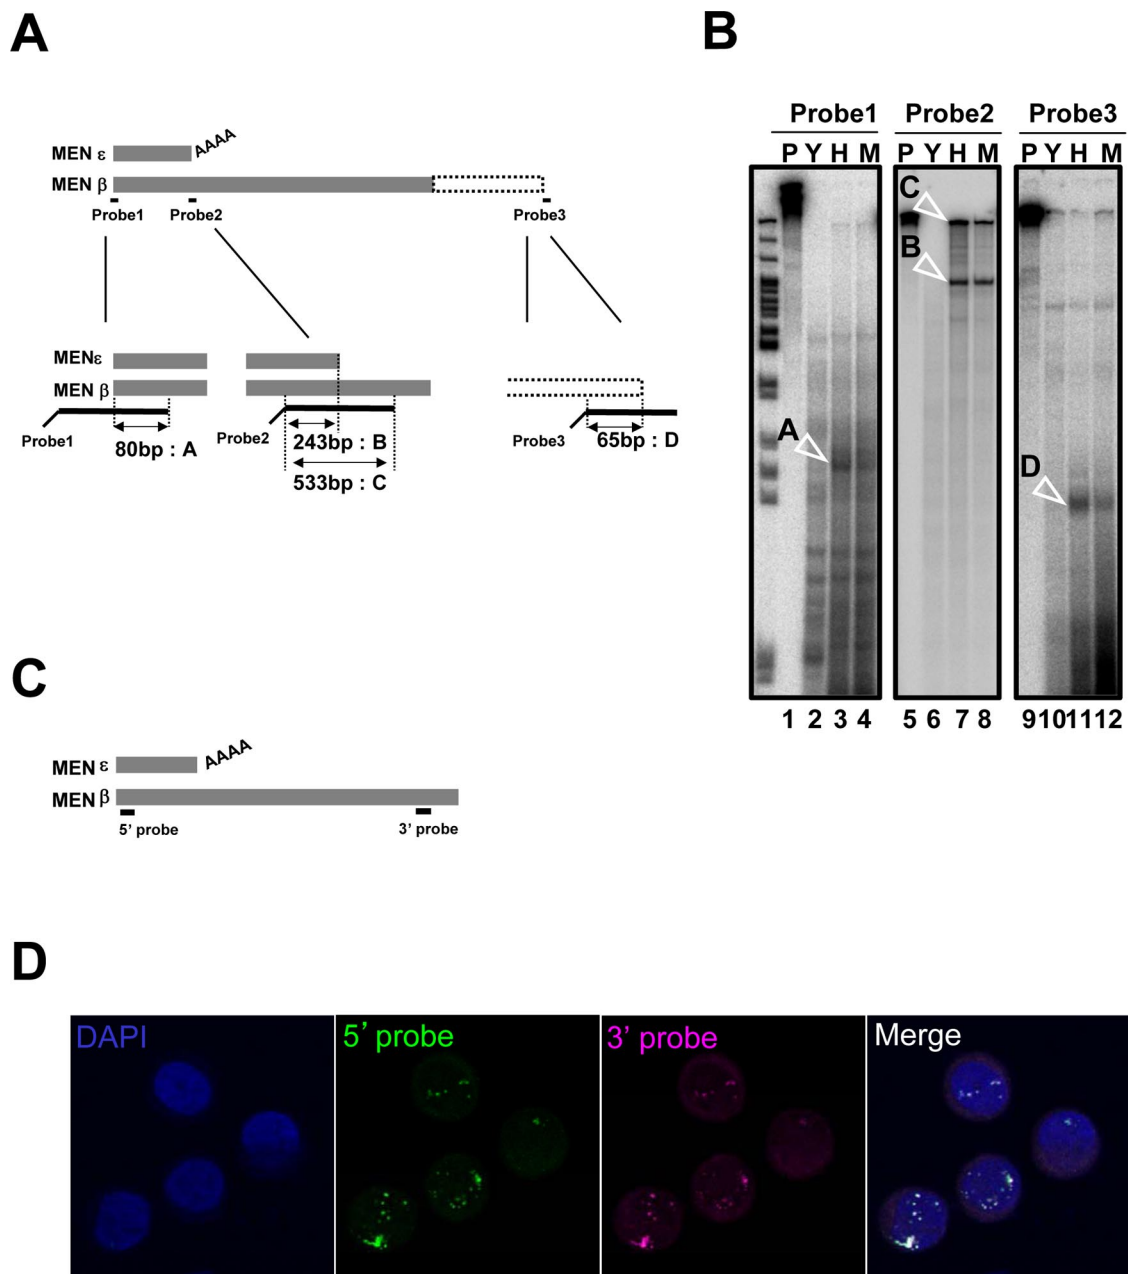

**Fig. S1.** Characterization of the short ( $MEN\epsilon$ ) and long ( $MEN\beta$ ) isoforms of the  $MEN$  transcripts. (A) Schematic diagram depicting the structure of  $MEN\epsilon/\beta$  transcripts with the mapped terminus. The positions of antisense RNA probes designed for the RNase protection assay (probes 1  $\approx$  3) are shown below. The 5' and 3' terminal regions of  $MEN\epsilon/\beta$  transcripts are enlarged in the lower figures. The sizes of the protected fragments (A–D in B) are also shown. (B) The protected fragments from RNase A/T1 digestion are indicated by the open arrowheads. RNAs prepared from HeLa (lane H), MRC5 (lane M), and yeast (lane Y; control) cells were used. The undigested probes are also shown (lane P). The molecular size marker is a  $^{32}P$ -labeled  $\psi$ X174 RF  $HincII$  digest fragment (lane MW). Quantitation of the intensities of bands B and C indicate that the accumulation ratio of  $MEN\beta$  to  $MEN\epsilon$  is 3:7. (C) Positions of the 2 probes relative to  $MEN\epsilon$  and  $\beta$  are shown schematically. (D) HeLa cells were subjected to FISH with 2 different probes. The 5' probe recognizes both  $MEN\epsilon$  and  $\beta$  (in green), whereas the 3' probe recognizes only  $MEN\beta$  (in magenta). The signal obtained by both probes coincides completely (Merge, white). Cells were counterstained with DAPI (blue).

**A****B**

MEN $\alpha$   
SC35  
DAPI

MEN $\epsilon/\beta$   
SC35  
DAPI

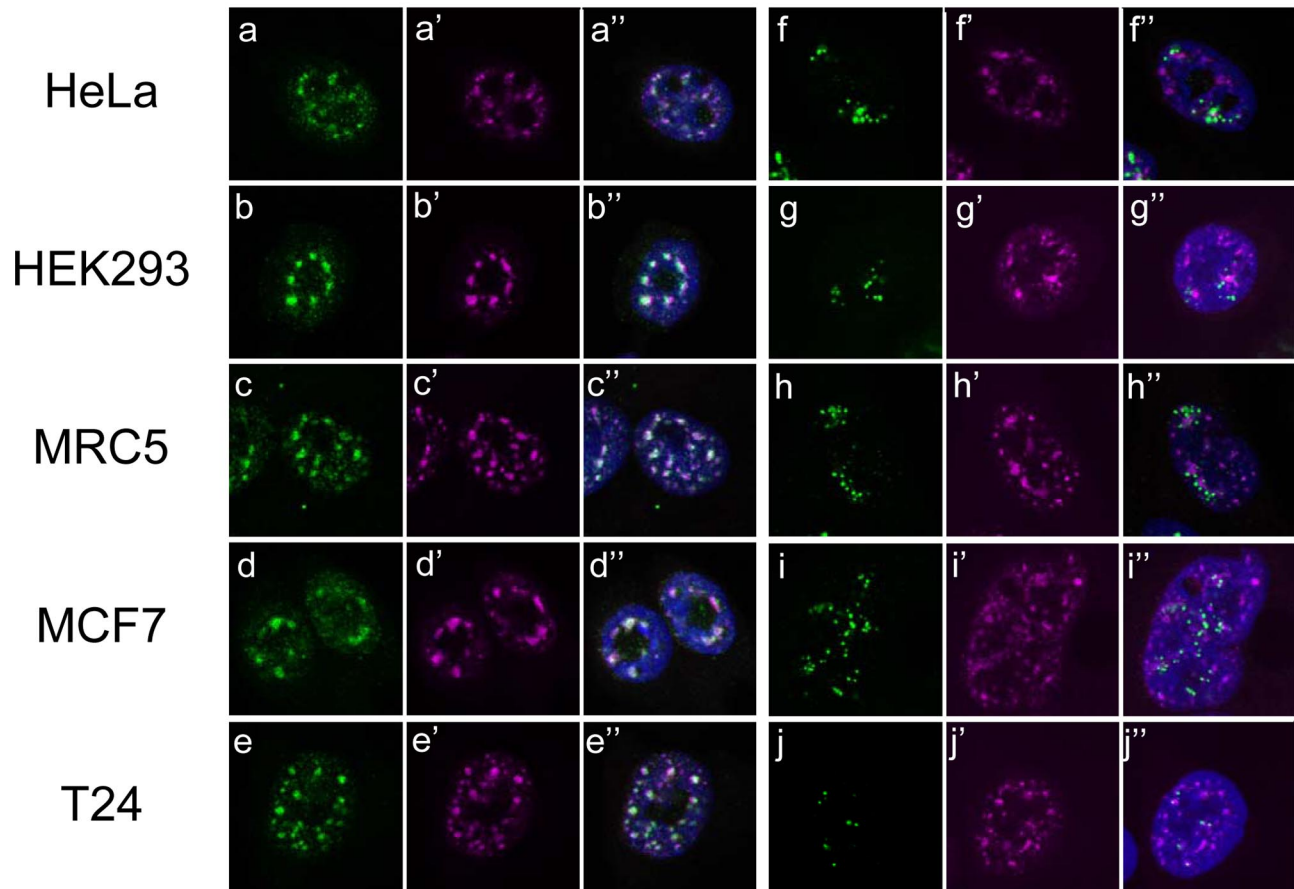

**Fig. S2.** MEN $\alpha$ , but not MEN $\epsilon/\beta$ , colocalizes to splicing speckles. FISH-IF experiments were carried out with various human cell lines. The probes for the RNAs (green, *a–e*, and *f–j*) and the speckle marker, SC35 (magenta, *a'–e'* and *f'–j'*), are indicated above each image. The names of the cell lines examined are indicated to the left of the images.

**A**

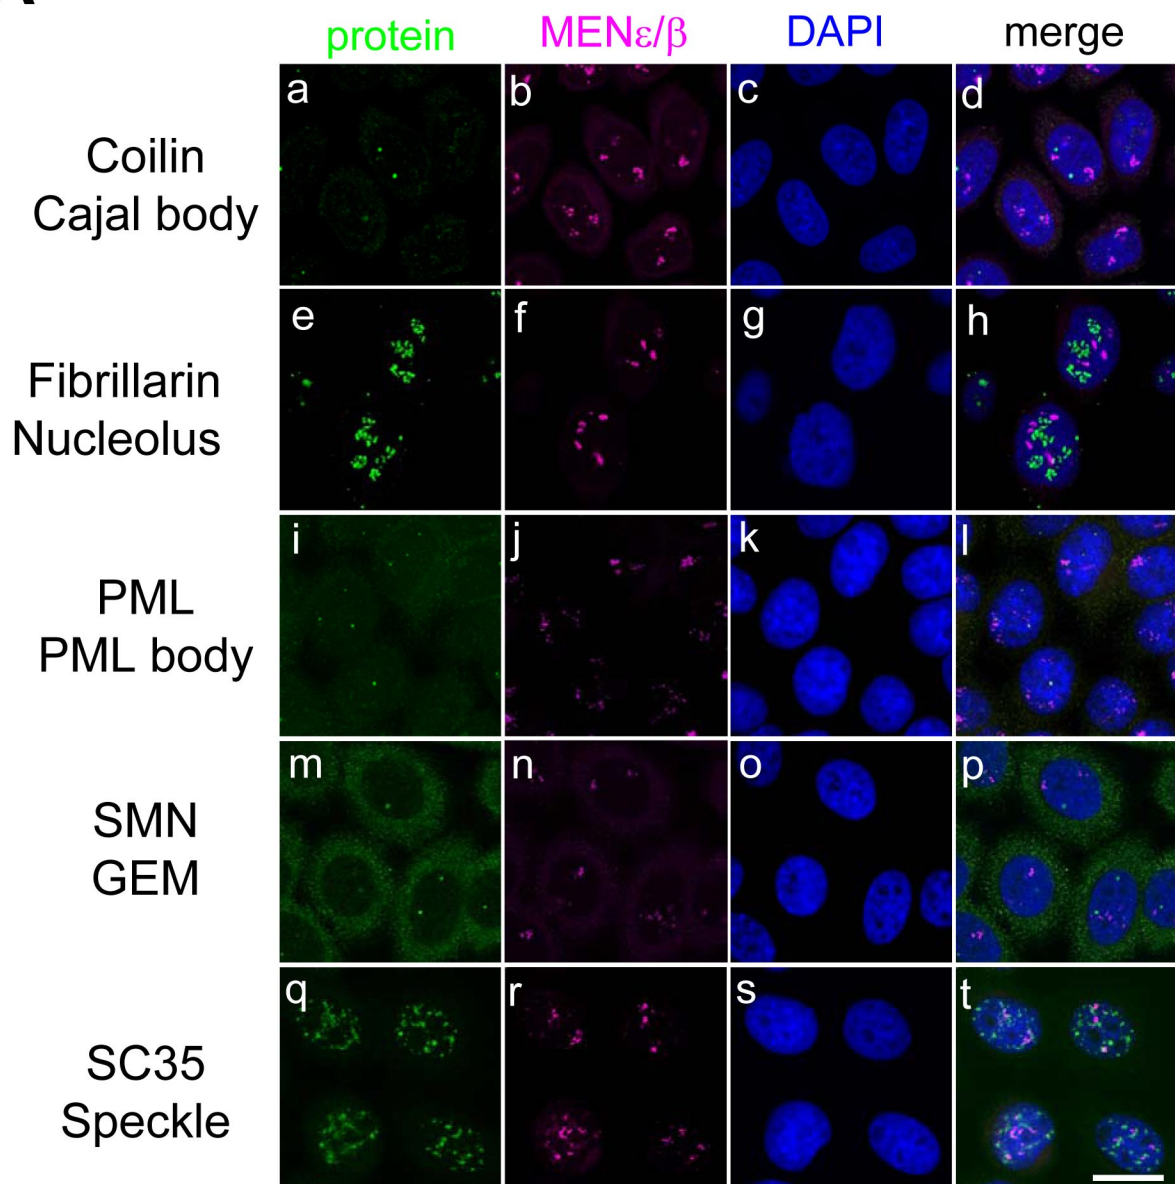

**B**

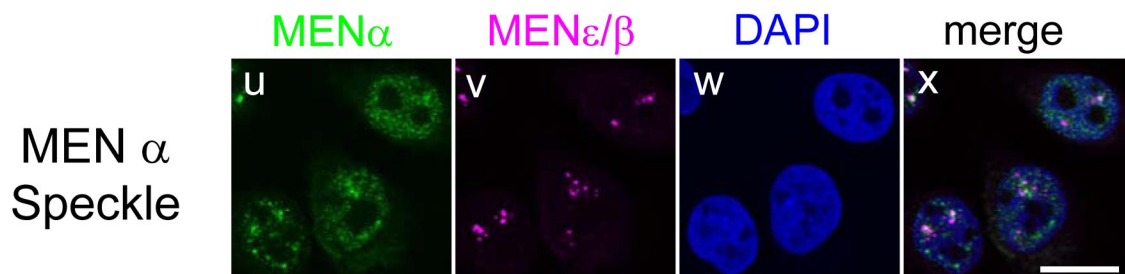

**Fig. S3.** Subnuclear localization of the MEN $\epsilon/\beta$  ncRNAs. FISH-IF experiments were carried out with a MEN $\epsilon/\beta$  probe in combination with antibodies against various marker proteins for known nuclear bodies (A) or with another ncRNA, MEN $\alpha$  (B). The names of the nuclear bodies and their marker proteins are indicated to the left of the images. (Scale bars: 10  $\mu$ m.)

**A**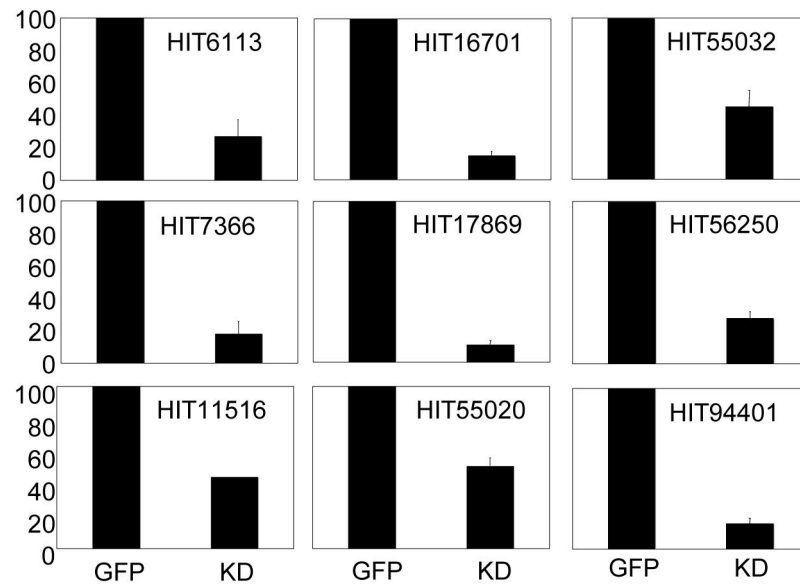**B**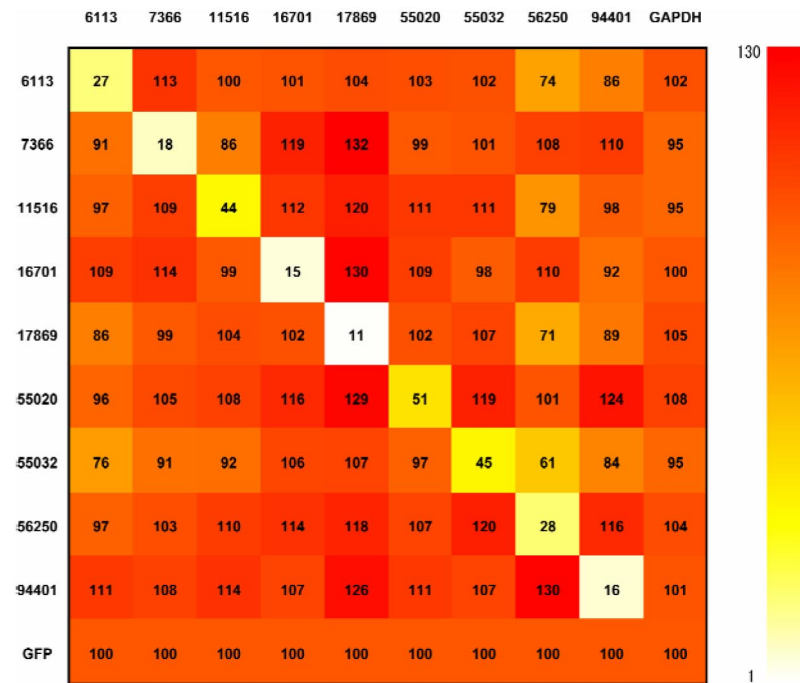

**Fig. S4.** Knockdown of nuclear-localized mRNA-like ncRNAs. (A) The RNA levels in cells treated with control oligonucleotide (GFP) or target oligonucleotide (KD) are shown. (B) The matrix depicts the target specificity of each knockdown oligonucleotide. The knockdown oligonucleotides are aligned on the vertical axis, and the residual ncRNA levels upon knockdown are aligned on the horizontal axis.



**A****Actinomycin D**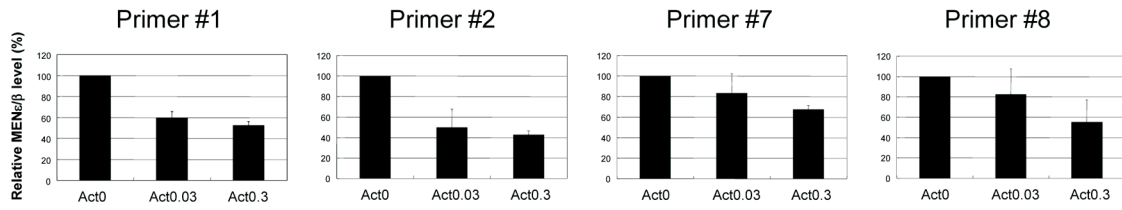**B****DRB**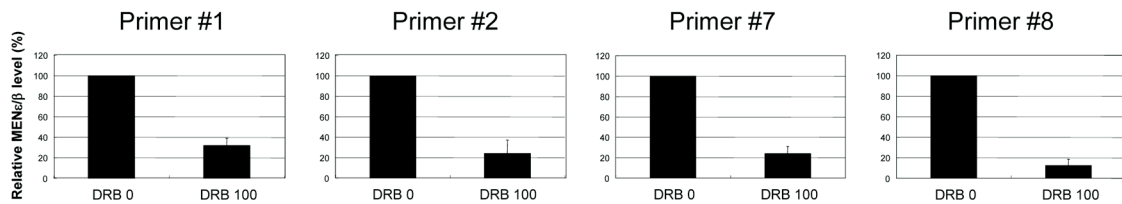

**Fig. S6.** Transcriptional inhibitors diminish the MEN $\beta$ / $\beta$  level. (A) Total RNA was extracted from cells treated with actinomycin D and subjected to RT-qPCR with 4 different primer pairs designed for MEN $\beta$ / $\beta$ . (B) RT-qPCR was performed as in A using total RNA extracted from DRB-treated cells. Experiments were repeated 3 times, including the experiments presented in Figs. 3 and 5 and Fig. S8.

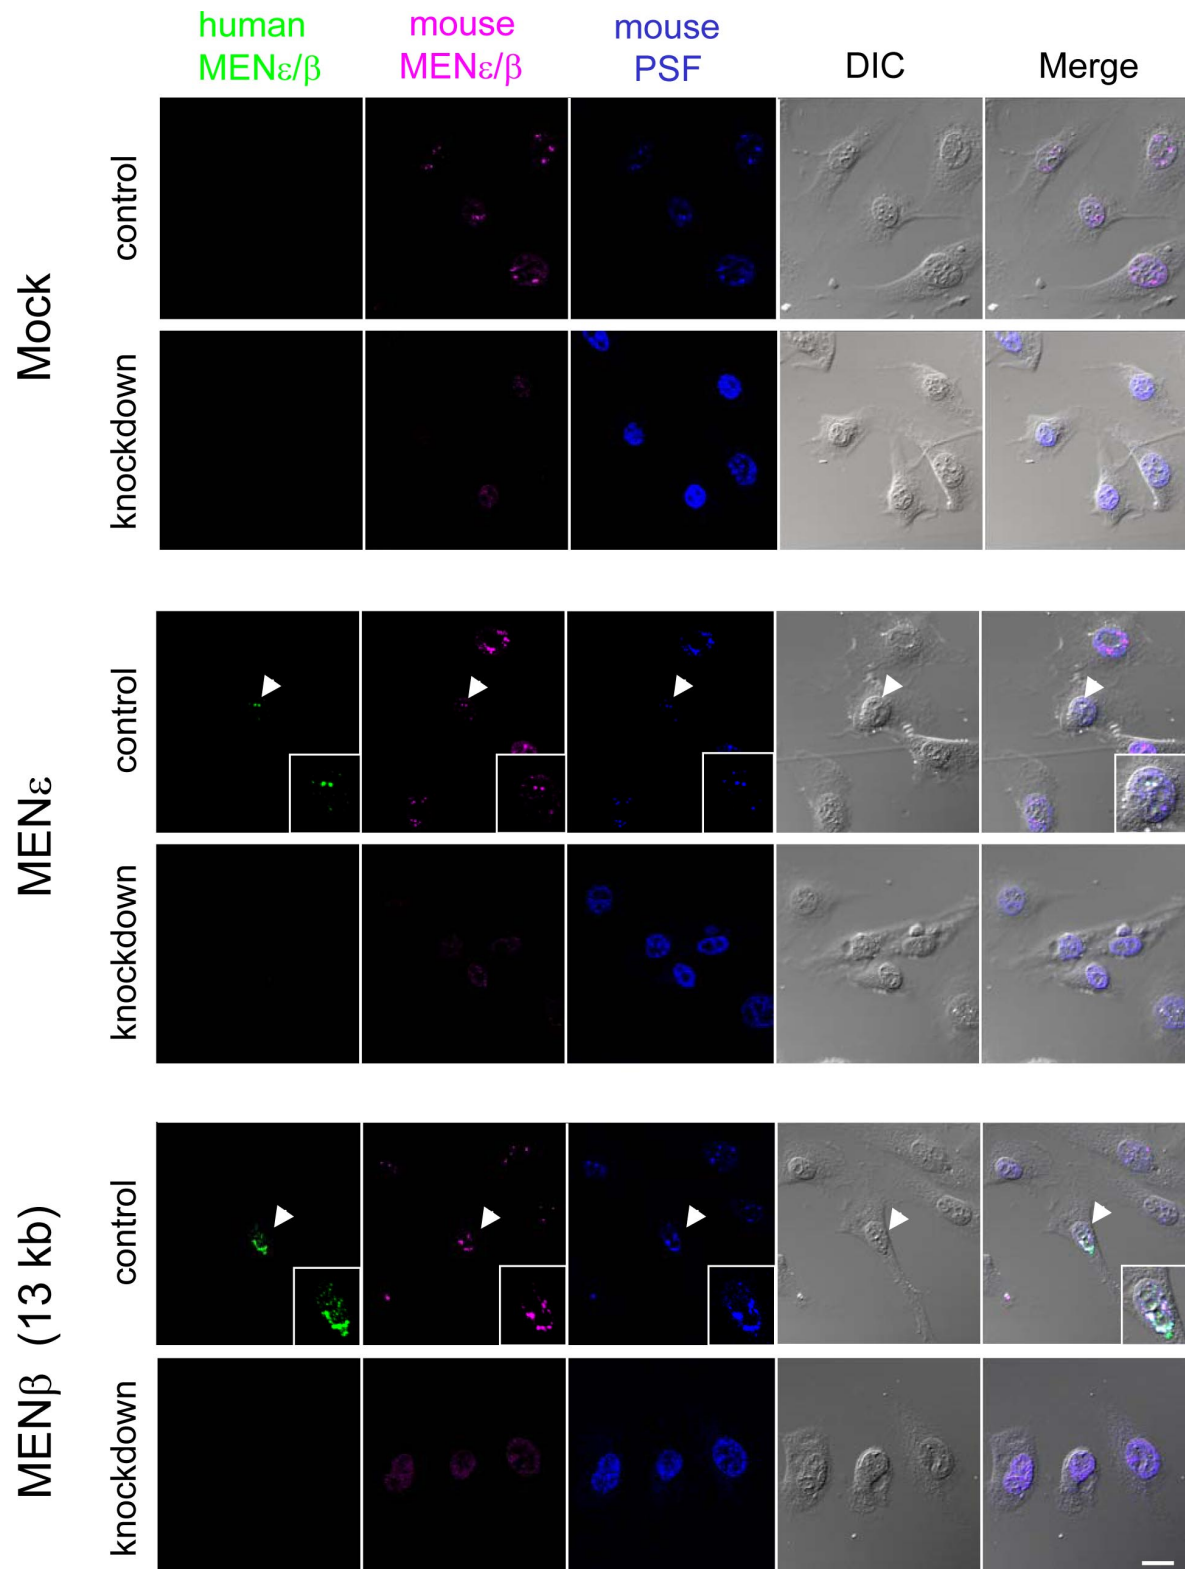

**Fig. S7.** Ectopically expressed MEN $\epsilon/\beta$  localize to paraspeckles but are incapable of rescuing disintegrated paraspeckles in MEN $\epsilon/\beta$  knockdown cells. Subcloned MEN $\epsilon/\beta$  were transfected into NIH 3T3 cells. Exogenous human MEN RNAs were detected by a human MEN probe (green) in combination with a mouse MEN probe (magenta) and an anti-PSF antibody (blue). Specimens were treated with DNase I before hybridization to minimize the background signal from plasmid templates. Mock, empty vector; DIC, differential interference contrast image. (Upper) Cells were treated with control antisense oligonucleotide. (Lower) Cells were treated with antisense oligonucleotide for mouse MEN $\epsilon/\beta$ . Arrowheads indicate the nuclei expressing human MEN $\epsilon/\beta$  RNA localized to paraspeckles. (Scale bar: 10  $\mu$ m.)

**A**

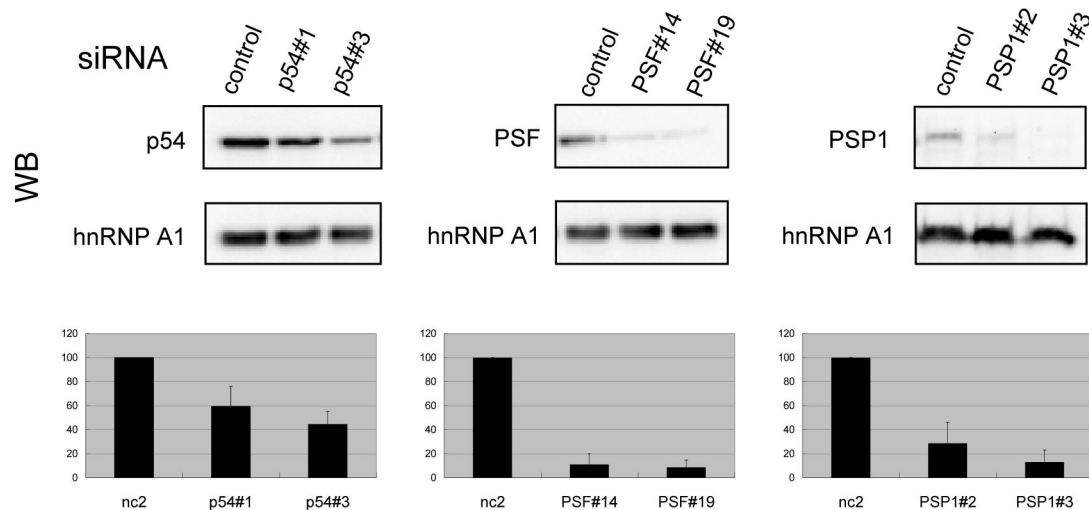

**B**

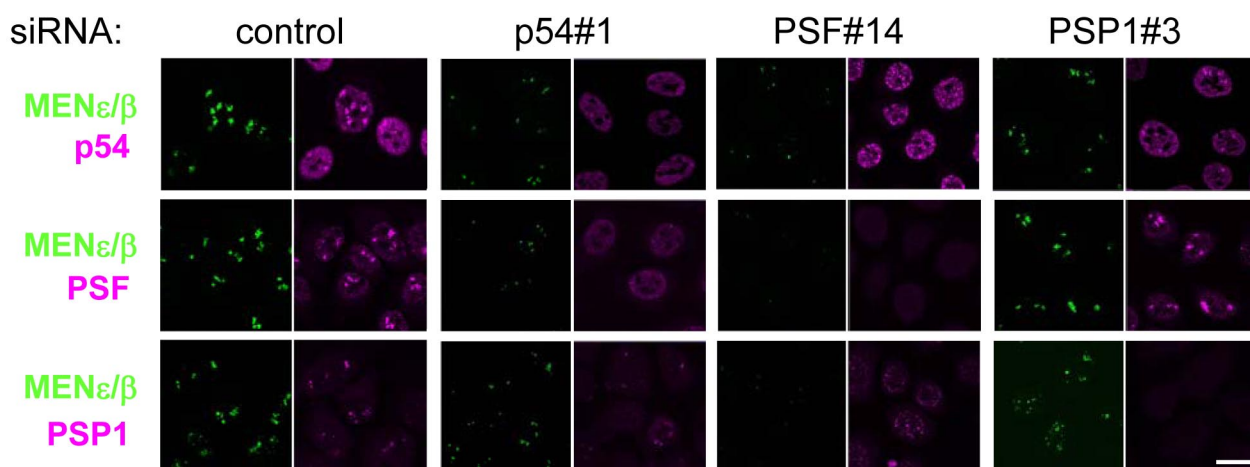

**Fig. S8.** Disruption of paraspeckle proteins affects paraspeckle integrity and MENε/β levels. (A) RNAi efficacy was confirmed by Western blotting. Blots of siRNA-treated cellular lysates were probed with antibodies for the paraspeckle proteins (p54, PSF, and PSP1) and quantified. The loading control for normalization was hnRNP A1. (B) FISH-IF of the paraspeckle protein knockdown cells. Cells were treated with the siRNA indicated above each image for 48 h and were then probed with MENε/β probe (green) in combination with an antibody to 1 of the 3 paraspeckle proteins (magenta: p54, PSF, or PSP1, top to bottom).

| Primer                                              | Direction | Sequence                            |
|-----------------------------------------------------|-----------|-------------------------------------|
| Eight primer pairs for MEN $\epsilon/\beta$ qRT-PCR |           |                                     |
| 1                                                   | Forward   | CTTCCTCCCTTTAACTTATCCATTAC          |
|                                                     | Reverse   | CTCTTCTCCACCATTACCAACAATAC          |
| 2                                                   | Forward   | AGCTGCGTCTATTGAATTGGTAAAGTAA        |
|                                                     | Reverse   | GACAGAAAAGATCCCAACGATAAAAATAA       |
| 3                                                   | Forward   | ACCTCTATAACCGCTTCTCTTCTTTT          |
|                                                     | Reverse   | CTGGAGACAGCACCATTTACATACAG          |
| 4                                                   | Forward   | GATCTTTTCACCCCAAGAGTACATAA          |
|                                                     | Reverse   | CTCACAAAAACACAGATTCCACAAC           |
| 5                                                   | Forward   | TGAGATCCTACCTCAGTTCCTTTGAG          |
|                                                     | Reverse   | ACTCTTGGTGAGAACGTAAAATGGTG          |
| 6                                                   | Forward   | CAGTTAGTTTATCAGTTCTCCCATCCA         |
|                                                     | Reverse   | GTTGTTGTCGTCACCTTTCAACTCT           |
| 7                                                   | Forward   | GGTGATTCAGTGGCATCTTTCTTAAC          |
|                                                     | Reverse   | AGCTTTACACATACACAGGTTCTCTGG         |
| 8                                                   | Forward   | GTCTTTCATCCACTCACGTCTATTT           |
|                                                     | Reverse   | GTA CTCTGTGATGGGGTAGTCAGTCAG        |
| The other primers for qRT-PCR                       |           |                                     |
| p54                                                 | Forward   | TTCTACCCTGGAAAAGTGTTAGGGATT         |
|                                                     | Reverse   | CTTGTTTAATACCACCCCTCCCTTG           |
| PSF                                                 | Forward   | AGAGGAAAAGTTACAGCCGAATGG            |
|                                                     | Reverse   | CATAACCTATGCCACCACCACT              |
| PSP1                                                | Forward   | ATTCTCAAGAGCAGACCTCTACGGATT         |
|                                                     | Reverse   | AACCACAACAGCTTTCTCTACTGGAC          |
| GAPDH                                               | Forward   | ATGAGAAGTATGACAACAGCCTCAAGAT        |
|                                                     | Reverse   | ATGAGTCTCTCCACGATACCAAAGTT          |
| Primer pairs for FISH probe subcloning              |           |                                     |
| 5' probe                                            | Forward   | TAGTTGTGGGGGAGGAAGTG                |
|                                                     | Reverse   | TGGCATGGACAAGTTGAAGA                |
| 3' probe                                            | Forward   | GTCTTTCATCCACTCACGTCTATTT           |
|                                                     | Reverse   | CACCTAACTCATCTTACAGACCACCAG         |
| Primer pairs for RPA probe subcloning               |           |                                     |
| Probe1                                              | Forward   | CGTCCCCGCCCGACCTC                   |
|                                                     | Reverse   | CCTGAAGCCCTGAGCTAGCCACTTC           |
| Probe2                                              | Forward   | CAATGACTTGGGGATGATGCAAACAATTACTG    |
|                                                     | Reverse   | GTA CTCCCCACCTACACACCCAC            |
| Probe3                                              | Forward   | AGGGAAGTAAGGAAGGTAGGAGGTG           |
|                                                     | Reverse   | CAGAGGATGAGGGAGGGGATAG              |
| Primer pair for MEN $\epsilon$ subcloning           |           |                                     |
| —                                                   | Forward   | TATACGCGTGCAAAAGTTGTGGCAAGTCCA      |
| —                                                   | Reverse   | TATGTTTAAACTGAGTTTAGTCAAACCTTATTTGT |
| Primer pairs for MEN $\beta$ subcloning             |           |                                     |
| Left arm                                            | Forward   | TATACGCGTGCAAAAGTTGTGGCAAGTCCA      |
|                                                     | Reverse   | TATGTTTAAACGCATGGACAAGTTGAAGATTAGC  |
| Right arm                                           | Forward   | TATGTTTAAACGATCTATCATGTATGCAGTGACC  |
|                                                     | Reverse   | TATAAGCTTCAGAAAATGTCTGAAGGAATATAATG |

**Table S2. Primary antibodies used in this report**

| Antigen     | Animal | Supplier       | Application | Dilution               | Reference |
|-------------|--------|----------------|-------------|------------------------|-----------|
| Coilin      | Mouse  | Abcam          | IF          | 1:1,000                |           |
| Fibrillarin | Rabbit | Santa Cruz     | IF          | 1:200                  |           |
| hnRNP A1    | Mouse  | ImmuQuest      | WB          | 1:8,000                |           |
| p54/nrb     | Mouse  | BD Biosciences | IF, WB      | 1:400, 1:2,500         |           |
| PML         | Mouse  | Y. Kurihara    | IF          | 1:50                   | 1         |
| PSF         | Mouse  | Y. Kurihara    | IF, WB      | 1:30, 1:250            | 1         |
| PSF         | Mouse  | Sigma          | IP          | 6 $\mu$ g per reaction |           |
| PSP1        | Mouse  | Y. Kurihara    | IF, WB      | 1:2, 1:100             | 1         |
| SMN         | Mouse  | Y. Kurihara    | IF          | 1:10                   | 1         |
| SC35        | Mouse  | Sigma          | IF          | 1:1,000                |           |
| Digoxigenin | Mouse  | Roche          | FISH        | 1:1,000                |           |
| Digoxigenin | Sheep  | Roche          | FISH        | 1:1,000                |           |
| FITC        | Mouse  | Roche          | FISH        | 1:1,000                |           |
| FITC        | Rabbit | Abcam          | FISH        | 1:1,000                |           |
| FLAG        | Mouse  | Sigma          | IP          | 2 $\mu$ g per reaction |           |

1. Myojin R, et al. (2004) Expression and functional significance of mouse paraspeckle protein 1 on spermatogenesis. *Biol Reprod* 71:926.

**Table S3. Probe combos that showed lowest *P* values**

| Dataset     | Probe A | Probe B | <i>P</i>      |
|-------------|---------|---------|---------------|
| p54-1       | 1       | 2       | 0.0066        |
| p54-3       | 1       | 2       | <b>0.0079</b> |
| PSF-14      | 1       | 2       | <b>0.0037</b> |
| PSF-19      | 1       | 2       | <b>0.0082</b> |
| PSP1-1      | 2       | 7       | 0.0709        |
| PSP1-2      | 5       | 8       | 0.0136        |
| αFlag.      | 1       | 2       | 0.0891        |
| αPSF.       | 1       | 2       | 0.0074        |
| Flag-pcDNA. | 1       | 2       | 0.0472        |
| Flag-p54.   | 1       | 2       | 0.0012        |

*P* < 0.001 are rendered in bold type.

| Target RNA                             | Sequence                                                      |
|----------------------------------------|---------------------------------------------------------------|
| HIT6113                                | 5'-mC*mG*mC*mC*mU*T*T*C*A*A*C*C*A*G*T*mC*mU*mC*mC*mC-3'       |
| HIT7366                                | 5'-mG*mU*mC*mC*mC*A*G*T*G*A*A*G*A*G*T*mC*mA*mG*mA*mU-3'       |
| HIT11516                               | 5'-mC*mG*mU*mC*mC*C*A*G*T*C*A*A*C*C*A*T*mA*mU*mU*mU*mC-3'     |
| HIT16701                               | 5'-mC*mU*mC*mC*mU*G*G*C*T*G*T*G*T*T*C*mA*mG*mU*mC*mC-3'       |
| HIT17869                               | 5'-mU*mC*mC*mC*mU*C*C*A*A*T*C*T*C*T*G*mC*mC*mU*mC*mC-3'       |
| HIT55020                               | 5'-mC*mC*mC*mU*mC*T*T*C*T*T*C*T*C*C*T*mG*mU*mU*mA*mA-3'       |
| HIT55032                               | 5'-mG*mU*mU*mC*mC*C*A*G*C*C*G*C*A*A*C*mC*mU*mC*mU*mG-3'       |
| HIT94401                               | 5'-mG*mU*mU*mU*mC*A*G*G*A*C*T*C*A*G*C*mU*mG*mG*mG*mU-3'       |
| MEN $\epsilon$ / $\beta$ #12           | 5'-mC*mC*mC*mU*mC*T*A*G*T*C*T*T* G*G*C*mU*mC*mA*mU*mU-3'      |
| MEN $\epsilon$ / $\beta$ #12 scrambled | 5'-mU*mC*mU* mG*mC*T* C*A*C* T*T*G* C*A*T*mG*mC*mC* mU*mU-3'  |
| MEN $\epsilon$ / $\beta$ #17           | 5'-mC*mC*mC*mU*mU*C*T*C*C*T*A*G* T*A*A*mU*mC*mU*mG*mC-3'      |
| MEN $\epsilon$ / $\beta$ #17 scrambled | 5'-mU*mA*mU* mC*mU*G* C*A*C* T*T*C* T*C*T* mC*mA*mC* mA*mC-3' |
| Mouse MEN $\epsilon$ / $\beta$         | 5'-mC*mC*mC*mA*mG*T*C*C*A*C*G*G*T*C*mU*mC*mC*mA*mU-3'         |
| GFP                                    | 5'-mU*mC*mA* mC*mC*T* T*C*A* C*C*C* T*C*T* mC*mC*mA* mC*mU-3' |

The asterisks represent the phosphothioate-modified backbone, and mN designates the 2'-O-methoxyribonucleotides

Table S5. Paired  $t$  test for Fig. 5D

| Primer A | Primer B | $P$          |
|----------|----------|--------------|
| 1        | 2        | 0.520        |
| 1        | 4        | 0.021        |
| 1        | 8        | <b>0.048</b> |
| 2        | 4        | <b>0.000</b> |
| 2        | 8        | <b>0.021</b> |
| 4        | 8        | 0.922        |

$P < 0.05$  are rendered in bold type.
